# Supplementary material for: Effects of a natural ingredients-based intervention targeting the hallmarks of aging on epigenetic clocks, physical function, and body composition: a single-arm clinical trial
Source: publisher site journal article supplement (doi:10.18632/aging.206221), 2025-03-14
Supplement: Supplementary file [file aging-vnull-206221-supplementary-material-SD1.pdf]

## SUPPLEMENTARY FIGURES

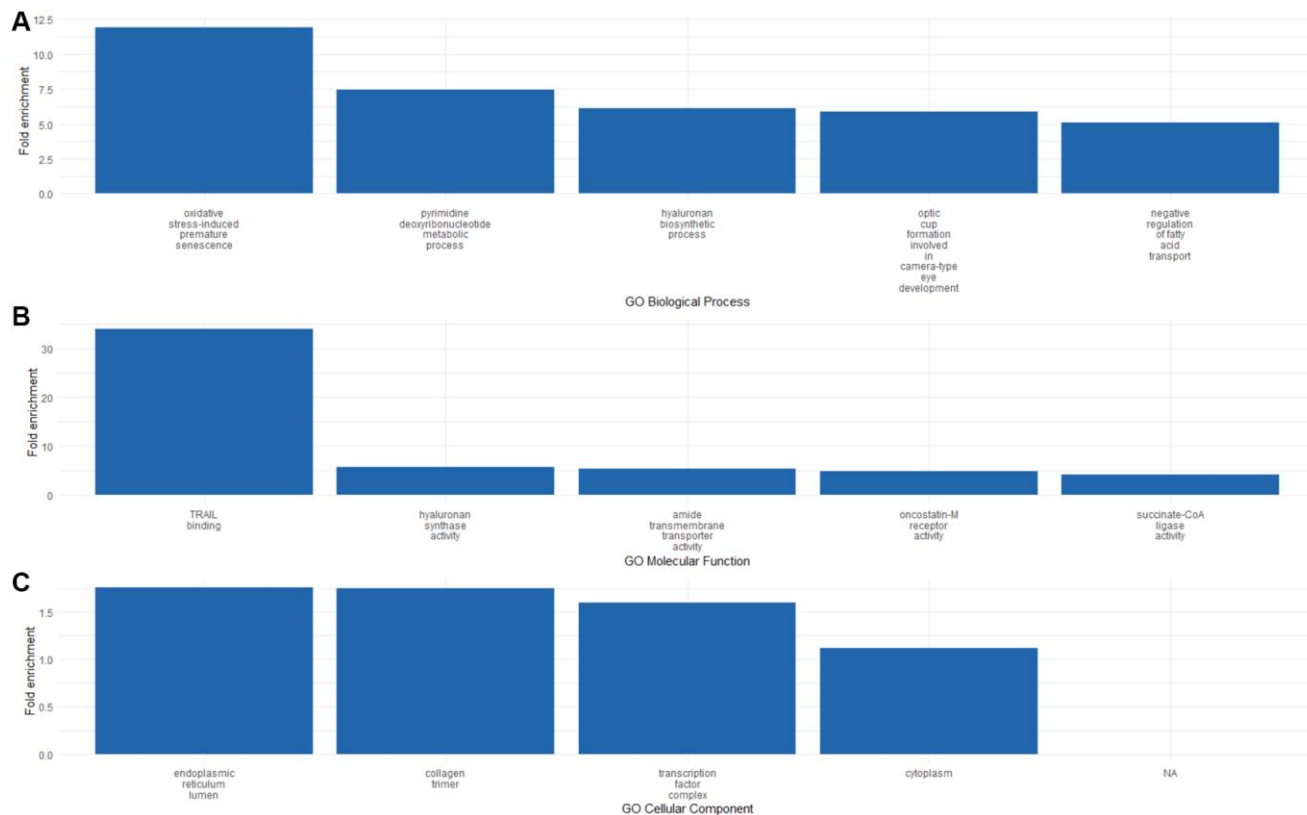

**Supplementary Figure 1. Gene Ontology (GO) terms enriched for the hypermethylated CpG sites after supplementation.** The Top 5 most enriched GO terms for Biological Processes (A), Molecular Function (B), and Cellular Component (C) were included. A nominal  $p$ -value  $<0.001$  was used to assign significance.

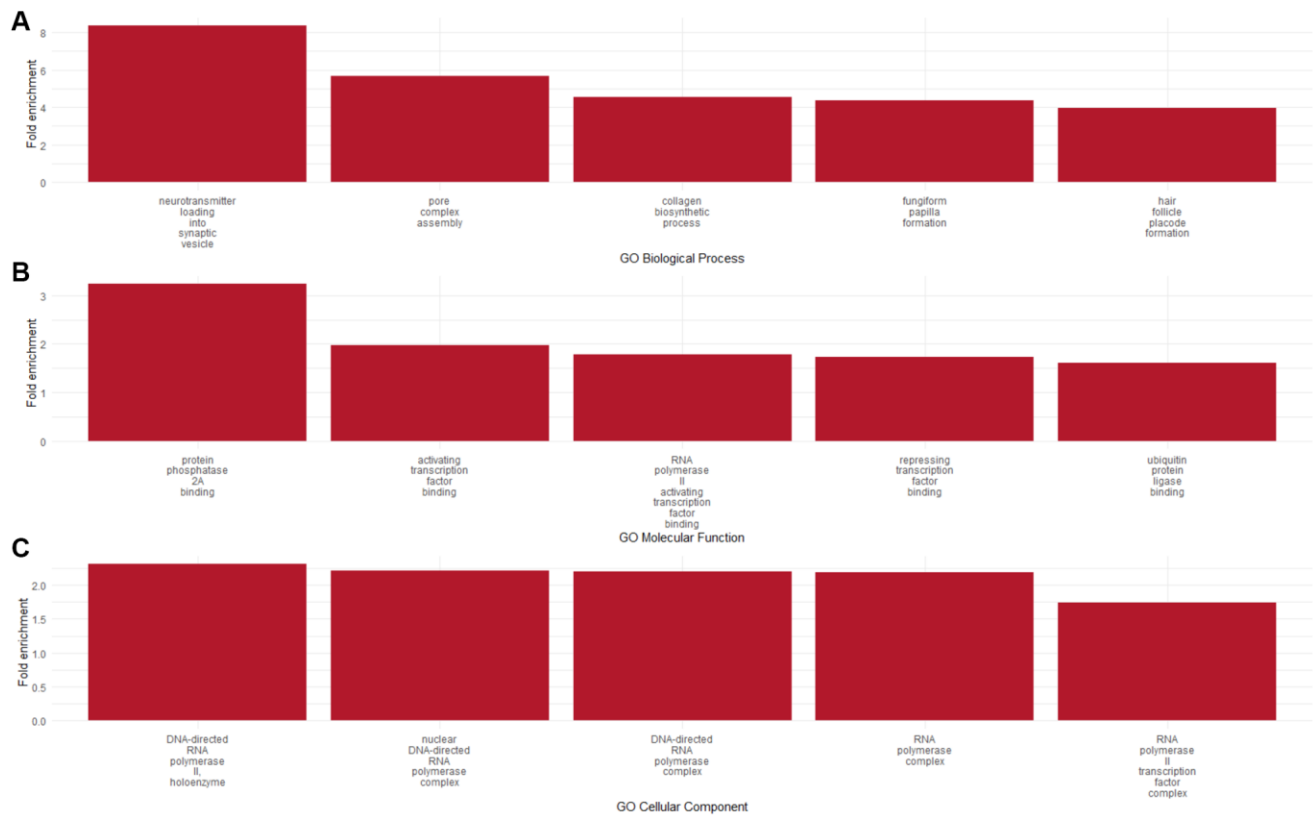

**Supplementary Figure 2. Gene Ontology (GO) terms enriched for the hypomethylated CpG sites after supplementation.** The Top 5 most enriched GO terms for Biological Processes (A), Molecular Function (B), and Cellular Components (C) were included. A nominal  $p$ -value  $<0.001$  was used to assign significance.
